# Supplementary material for: Probing the applicability of autotransporter based surface display with the EstA autotransporter of Pseudomonas stutzeri A15
Source: PubMed Central journal article supplement (PMC3546941; doi:10.1186/1475-2859-11-158), 2012-12-13
Supplement: 1475-2859-11-158-S1.pdf [file 1475-2859-11-158-S1.pdf]

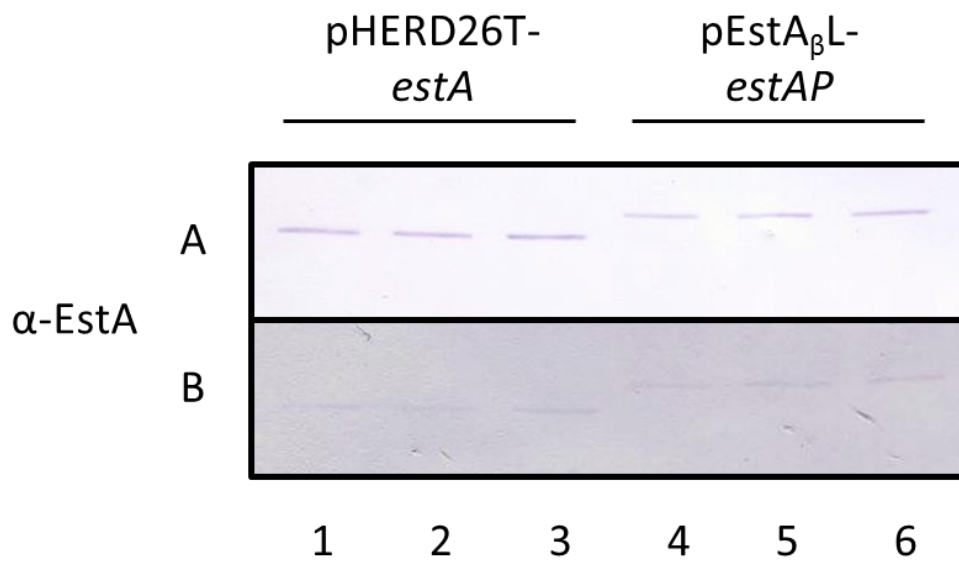

**Figure S1: Assessment of the fusion protein concentration in the membrane fractions of *P. stutzeri* A15 pHERD26T-*estA* or pEstA<sub>β</sub>L-*estAP*.** Western blot with anti-EstA serum (α-EstA) of membrane fraction samples, used to measure the relative esterase activity of membrane fractions of *P. stutzeri* A15 pHERD26T-*estA* or pEstA<sub>β</sub>L-*estAP* (Figure 1E), to show equal amounts of EstA/EstAP in the applied samples. Membrane fractions in B are 2.5 times diluted compared to A.
