# Supplementary material for: Probing the applicability of autotransporter based surface display with the EstA autotransporter of Pseudomonas stutzeri A15
Source: PubMed Central journal article supplement (PMC3546941; doi:10.1186/1475-2859-11-158), 2012-12-13
Supplement: 1475-2859-11-158-S2.pdf [file 1475-2859-11-158-S2.pdf]

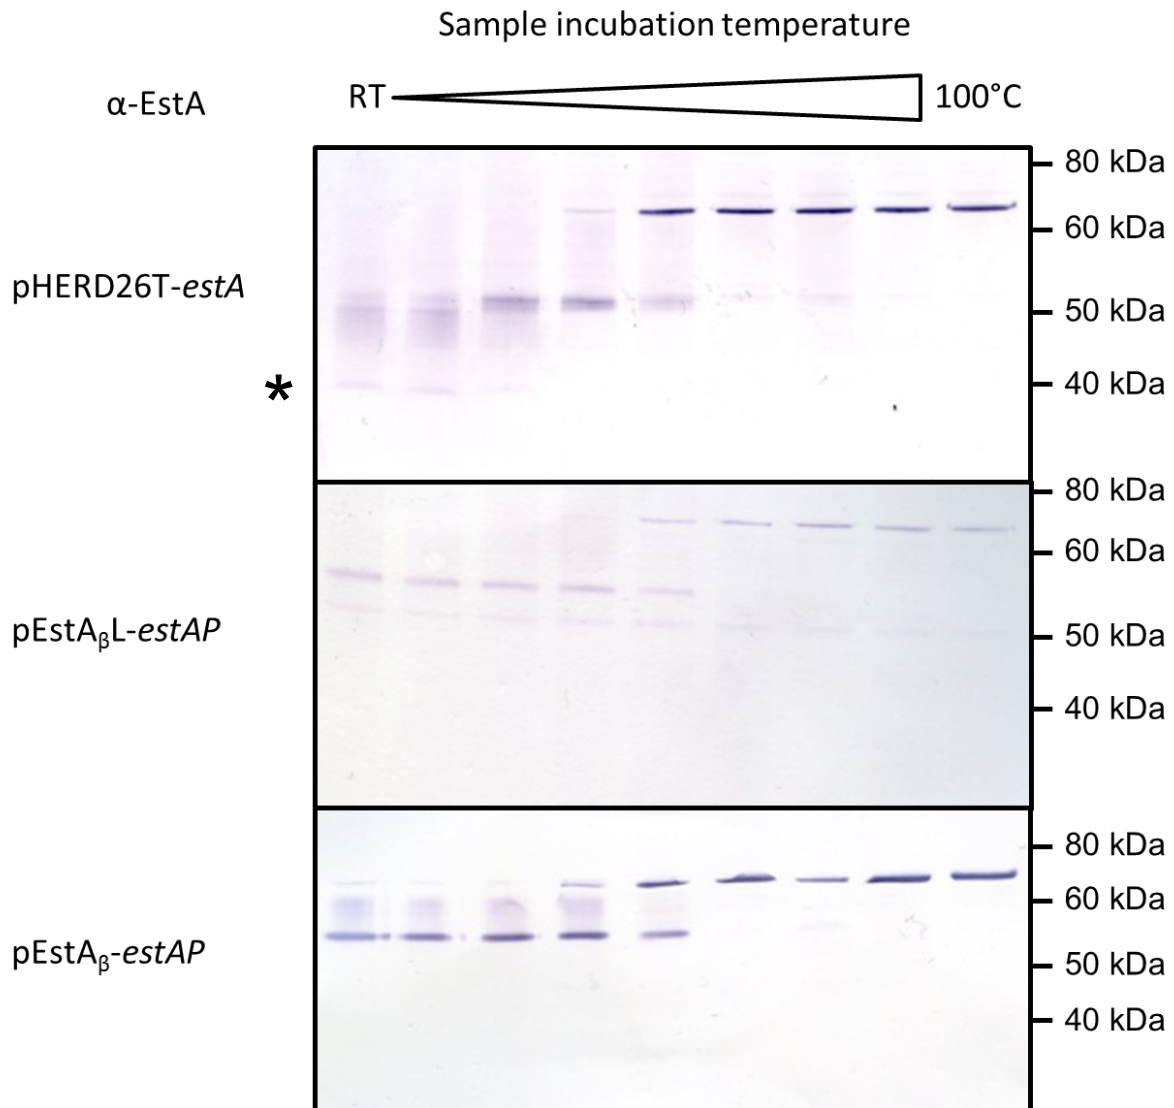

**Figure S2: Heat modifiability analysis of proteins in the membrane fractions of *P. stutzeri* A15 pHERD26T-*estA*, pEstA $_{\beta}$ -*estAP* and pEstA $_{\beta}$ L-*estAP*.** SDS-PAGE samples were incubated at different temperatures (room temperature [RT]-100°C) and analyzed with Western blot using anti-EstA serum ( $\alpha$ -EstA). The passenger domain of proteins of pHERD26T-*estA* shows an additional heat modifiability, indicated with an \*. Molecular weight markers are indicated at the side of the panels.
