# Supplementary material for: Probing the applicability of autotransporter based surface display with the EstA autotransporter of Pseudomonas stutzeri A15
Source: PubMed Central journal article supplement (PMC3546941; doi:10.1186/1475-2859-11-158), 2012-12-13
Supplement: 1475-2859-11-158-S3.pdf [file 1475-2859-11-158-S3.pdf]

Table S1 Plasmids used in this study

| Plasmid                             | Relevant characteristics                                                                                                                               | Reference  |
|-------------------------------------|--------------------------------------------------------------------------------------------------------------------------------------------------------|------------|
| pHERD26T                            | pBAD-promoter, Tc <sup>R</sup> , pRO-1600 <i>ori</i> , pBR322 <i>ori</i> , <i>oriT</i>                                                                 | [1]        |
| pHERD26T- <i>estA</i>               | pHERD26T containing <i>estA</i> in EcoRI and XbaI                                                                                                      | [2]        |
| pEstA <sub>β</sub>                  | pHERD26T containing the <i>estA</i> signal peptide and β-domain (W328-L636), E-epitope tag and SfiI sites comprising a pUC19 fragment                  | This study |
| pEstA <sub>β</sub> - <i>estAP</i>   | pEstA <sub>β</sub> containing EstA passenger domain (EstAP; P27-S325) in SfiI sites                                                                    | This study |
| pEstA <sub>β</sub> - <i>bla</i>     | pEstA <sub>β</sub> containing <i>bla</i> in SfiI sites                                                                                                 | This study |
| pEstA <sub>β</sub> - <i>aiiA</i>    | pEstA <sub>β</sub> containing <i>aiiA</i> <sub>soil</sub> in SfiI sites                                                                                | This study |
| pEstA <sub>β</sub> - <i>aiiB</i>    | pEstA <sub>β</sub> containing <i>aiiB</i> in SfiI sites                                                                                                | This study |
| pEstA <sub>β</sub> - <i>attM</i>    | pEstA <sub>β</sub> containing <i>attM</i> in SfiI sites                                                                                                | This study |
| pEstA <sub>β</sub> - <i>mCherry</i> | pEstA <sub>β</sub> containing <i>mCherry</i> in SfiI sites                                                                                             | This study |
| pEstA <sub>β</sub> - <i>eGFP</i>    | pEstA <sub>β</sub> containing <i>eGFP</i> in SfiI sites                                                                                                | This study |
| pEstA <sub>β</sub> - <i>yEVENUS</i> | pEstA <sub>β</sub> containing <i>yEVENUS</i> in SfiI sites                                                                                             | This study |
| pEstA                               | pHERD26T containing the <i>estA</i> signal peptide and full length <i>estA</i> AT (V20-L636), E-epitope tag and SfiI sites comprising a pUC19 fragment | This study |
| pEstA- <i>bla</i>                   | pEstA containing <i>bla</i> in SfiI sites                                                                                                              | This study |
| pEstA- <i>aiiA</i>                  | pEstA containing <i>aiiA</i> <sub>soil</sub> in SfiI sites                                                                                             | This study |
| pEstA- <i>aiiB</i>                  | pEstA containing <i>aiiB</i> in SfiI sites                                                                                                             | This study |
| pEstA- <i>attM</i>                  | pEstA containing <i>attM</i> in SfiI sites                                                                                                             | This study |
| pEstA- <i>mCherry</i>               | pEstA containing <i>mCherry</i> in SfiI sites                                                                                                          | This study |
| pEstA- <i>eGFP</i>                  | pEstA containing <i>eGFP</i> in SfiI sites                                                                                                             | This study |
| pEstA- <i>yEVENUS</i>               | pEstA containing <i>yEVENUS</i> in SfiI sites                                                                                                          | This study |
| pEstA*                              | pEstA carrying S-A mutation in the catalytic triad of the EstA passenger domain                                                                        | This study |
| pEstA*- <i>bla</i>                  | pEstA* containing <i>bla</i> in SfiI sites                                                                                                             | This study |
| pEstA*- <i>aiiA</i>                 | pEstA* containing <i>aiiA</i> <sub>soil</sub> in SfiI sites                                                                                            | This study |
| pEstA*- <i>aiiB</i>                 | pEstA* containing <i>aiiB</i> in SfiI sites                                                                                                            | This study |
| pEstA*- <i>attM</i>                 | pEstA* containing <i>attM</i> in SfiI sites                                                                                                            | This study |
| pEstA*- <i>mCherry</i>              | pEstA* containing <i>mCherry</i> in SfiI sites                                                                                                         | This study |
| pEstA*- <i>eGFP</i>                 | pEstA* containing <i>eGFP</i> in SfiI sites                                                                                                            | This study |
| pEstA*- <i>yEVENUS</i>              | pEstA* containing <i>yEVENUS</i> in SfiI sites                                                                                                         | This study |
| pRK2073                             | Sp <sup>R</sup> , Tra+, Mob+, ColEI replicon                                                                                                           | [3]        |
| pUC19                               | Ap <sup>R</sup> , ColEI replicon                                                                                                                       | [4]        |
| pMIR101                             | <i>aiiA</i> <sub>soil</sub> containing vector, Km <sup>R</sup>                                                                                         | [5]        |
| pKT103                              | <i>yEVENUS</i> containing vector, Km <sup>R</sup>                                                                                                      | [6]        |
| pET28a- <i>mCherry</i>              | <i>mCherry</i> containing vector, Km <sup>R</sup>                                                                                                      | [7]        |
| pET28a- <i>eGFP</i>                 | <i>eGFP</i> containing vector, Km <sup>R</sup>                                                                                                         | [8]        |

- [1] Qiu DR, Damron FH, Mima T, Schweizer HP, Yu HD: **P-BAD-based shuttle vectors for functional analysis of toxic and highly regulated genes in *Pseudomonas* and *Burkholderia* spp. and other bacteria.** *Appl Environ Microbiol* 2008, **74**(23):7422–7426.
- [2] Nicolay T, Devleeschouwer K, Vanderleyden J, Spaepen S: **Characterization of Esterase A, a *Pseudomonas stutzeri* A15 autotransporter.** *Appl Environ Microbiol* 2012, **78**(8):2533–2542.
- [3] Figurski DH, Helinski DR: **Replication of an origin-containing derivative of plasmid RK2 dependent on a plasmid function provided in trans.** *P Natl Acad Sci USA* 1979, **76**(4):1648–1652.
- [4] Yanisch-Perron C, Vieira J, Messing J: **Improved M13 phage cloning vectors and host strains: Nucleotide sequences of the M13mp18 and pUC19 vectors.** *Gene* 1985, **33**(1):103–119.
- [5] Carlier A, Uroz S, Smadja B, Fray R, Latour X, Dessaux Y, Faure D: **The Ti plasmid of *Agrobacterium tumefaciens* harbors an *attM*-paralogous gene, *aiiB*, also encoding N-acyl homoserine lactonase activity.** *Appl Environ Microbiol* 2003, **69**(8):4989–4993.
- [6] Sheff MA, Thorn KS: **Optimized cassettes for fluorescent protein tagging in *Saccharomyces cerevisiae*.** *Yeast* 2004, **21**(8):661–670.
- [7] De Meulenaere E, De Wergifosse M, Botek E, Spaepen S, Champagne B, Vanderleyden J, Clays K: **Nonlinear optical properties of mStrawberry and mCherry for second harmonic imaging.** *Journal of Nonlinear Optical Physics & Materials* 2010, **19**(1):1–13.
- [8] De Meulenaere E, Asselberghs I, de Wergifosse M, Botek E, Spaepen S, Champagne B, Vanderleyden J, Clays K: **Second-order nonlinear optical properties of fluorescent proteins for second-harmonic imaging.** *J Mater Chem* 2009, **19**(40):7514–7519.
