# Supplementary material for: Probing the applicability of autotransporter based surface display with the EstA autotransporter of Pseudomonas stutzeri A15
Source: PubMed Central journal article supplement (PMC3546941; doi:10.1186/1475-2859-11-158), 2012-12-13
Supplement: 1475-2859-11-158-S4.pdf [file 1475-2859-11-158-S4.pdf]

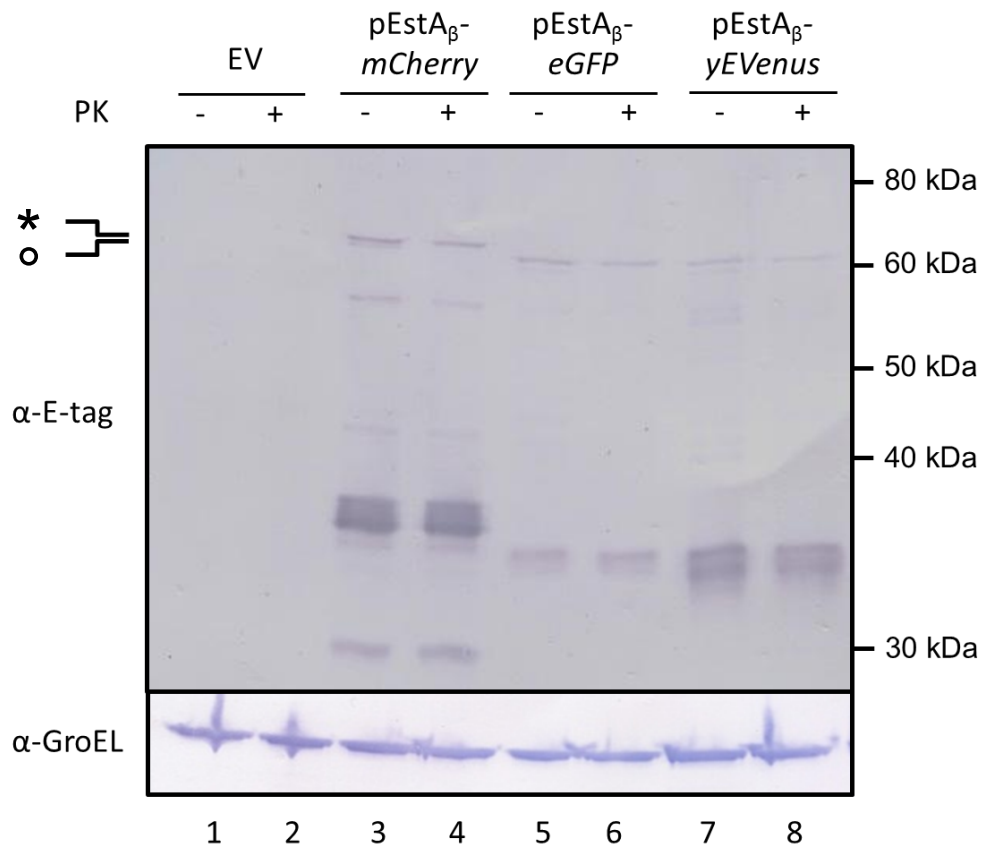

**Figure S3: Proteinase K accessibility of fusion proteins from *P. stutzeri* A15 pEstA<sub>β</sub>-*mCherry/eGFP/yEVENUS*.** Induced cells of *P. stutzeri* A15 pEstA<sub>β</sub>-*mCherry/eGFP/yEVENUS* or empty vector (EV) were treated with proteinase K (PK +) or mock-treated (PK -). Samples were analyzed with Western blot using anti-E-tag antibodies (α-E-tag) or anti-GroEL antibodies (α-GroEL). Molecular weight markers are indicated at the side of the panels.
