# Supplementary material for: Probing the applicability of autotransporter based surface display with the EstA autotransporter of Pseudomonas stutzeri A15
Source: PubMed Central journal article supplement (PMC3546941; doi:10.1186/1475-2859-11-158), 2012-12-13
Supplement: 1475-2859-11-158-S5.pdf [file 1475-2859-11-158-S5.pdf]

S4

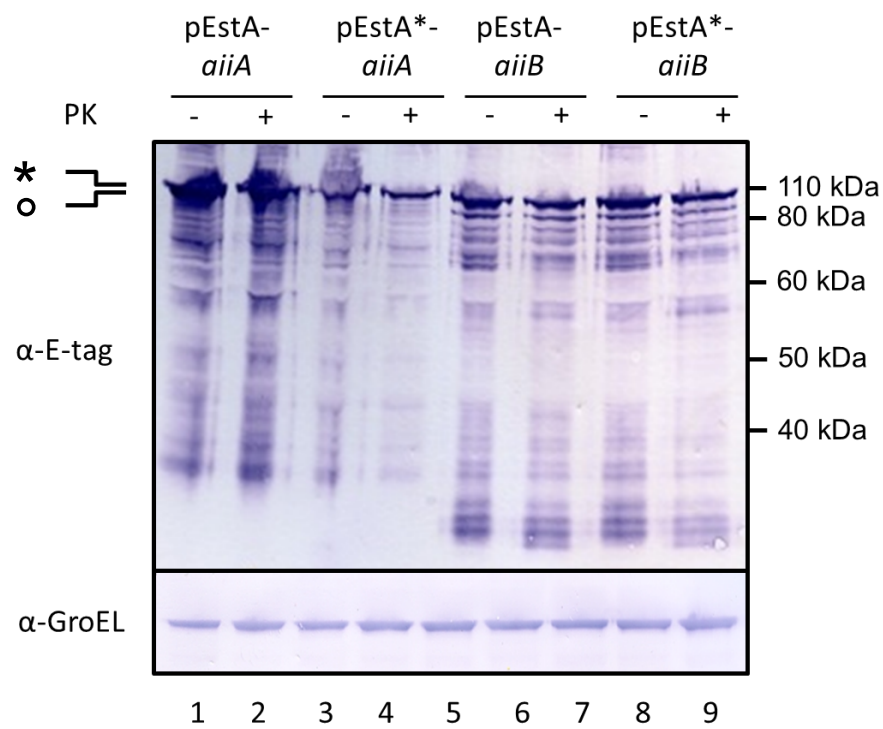

S5

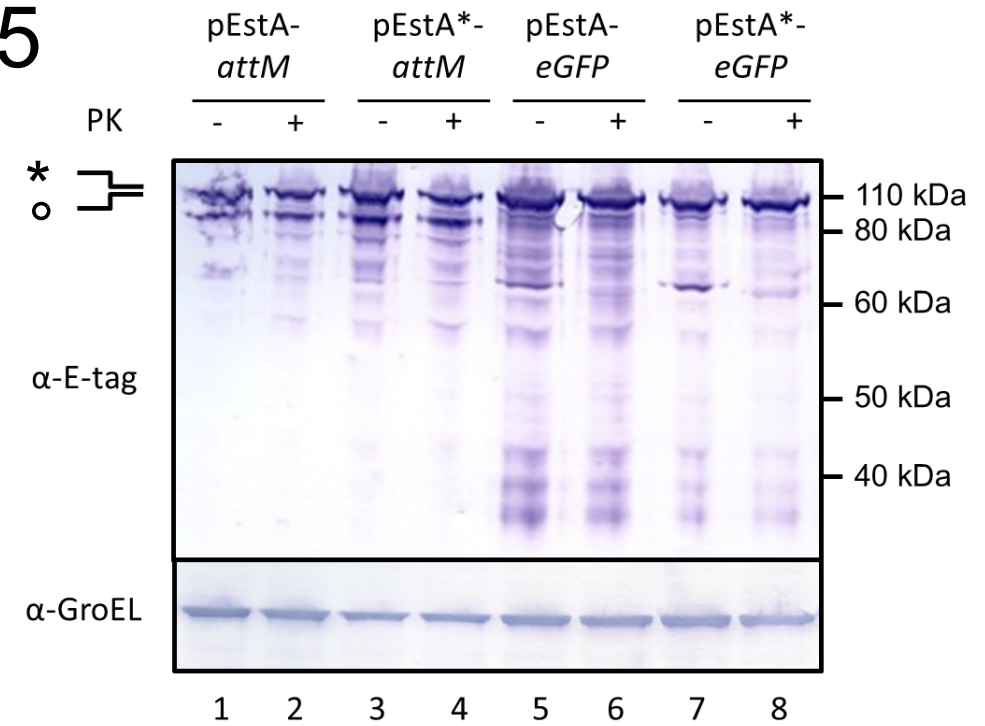

S6

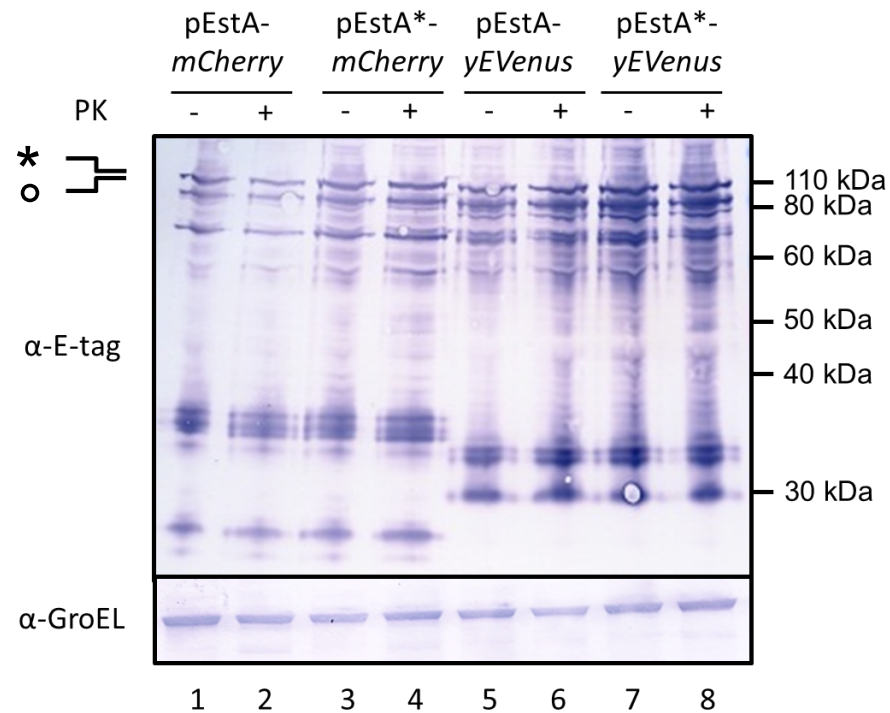

S7

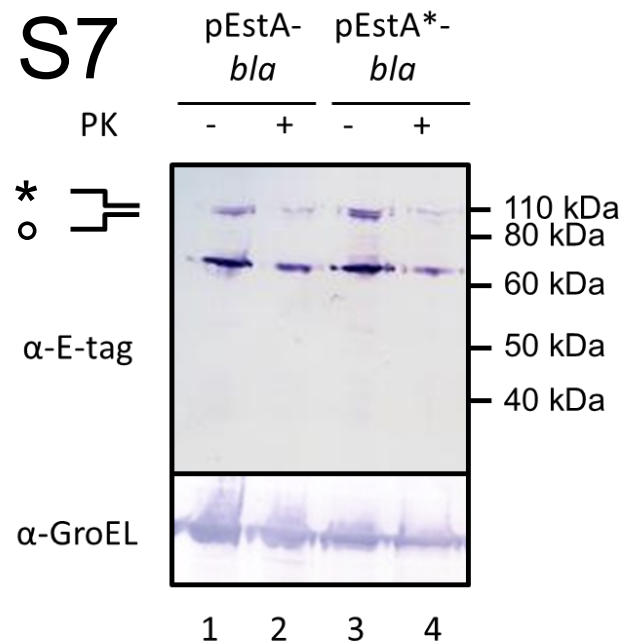

**Figures S4-S7: Proteinase K accessibility of fusion proteins from *P. stutzeri* A15 pEstA/pEstA\*-*aiiA/aiiB/attM/eGFP/mCherry/yEVENus/bla*.** Induced cells of *P. stutzeri* A15 pEstA/pEstA\*-*aiiA/aiiB* (S4), pEstA/pEstA\*-*attM/eGFP* (S5), pEstA/pEstA\*-*mCherry/yEVENus* (S6) and pEstA/pEstA\*-*bla* (S7) were treated with proteinase K (PK +) or mock-treated (PK -). Samples were analyzed with Western blot using anti-E-tag antibodies (α-E-tag). The band with the higher apparent molecular weight, containing the signal peptide, is indicated with a '\*'. The band with the lower apparent molecular weight, without the signal peptide is indicated with an 'o'. Molecular weight markers are indicated at the side of the panels.
