# Supplementary material for: Probing the applicability of autotransporter based surface display with the EstA autotransporter of Pseudomonas stutzeri A15
Source: PubMed Central journal article supplement (PMC3546941; doi:10.1186/1475-2859-11-158), 2012-12-13
Supplement: 1475-2859-11-158-S6.pdf [file 1475-2859-11-158-S6.pdf]

# S8

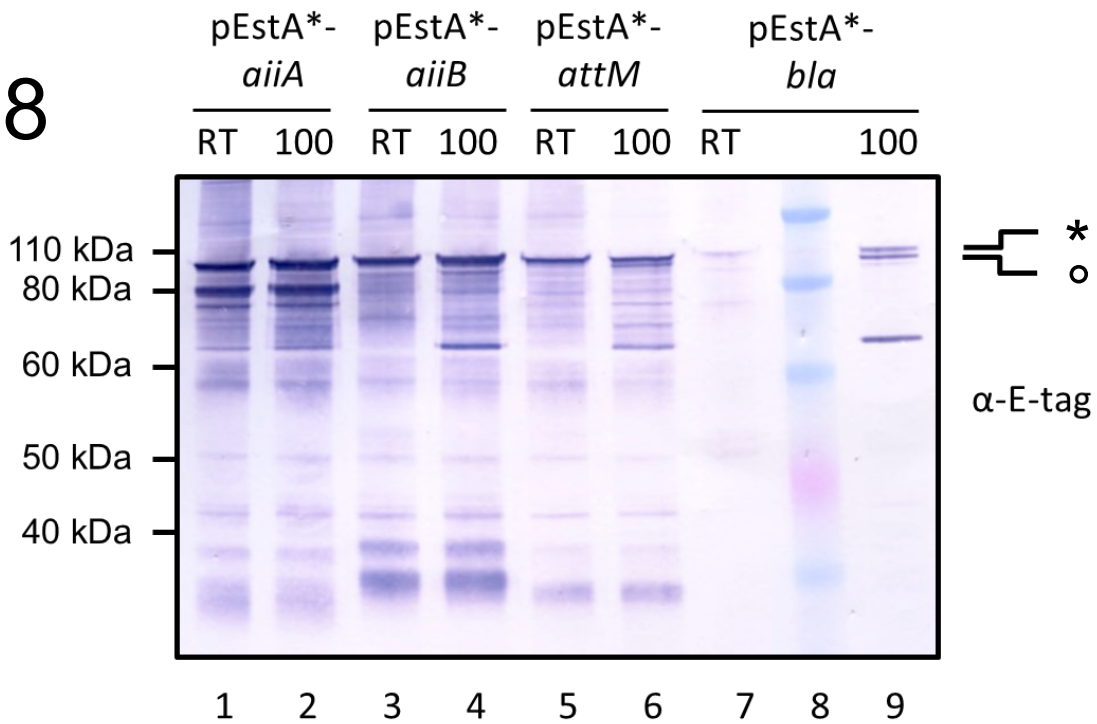

# S9

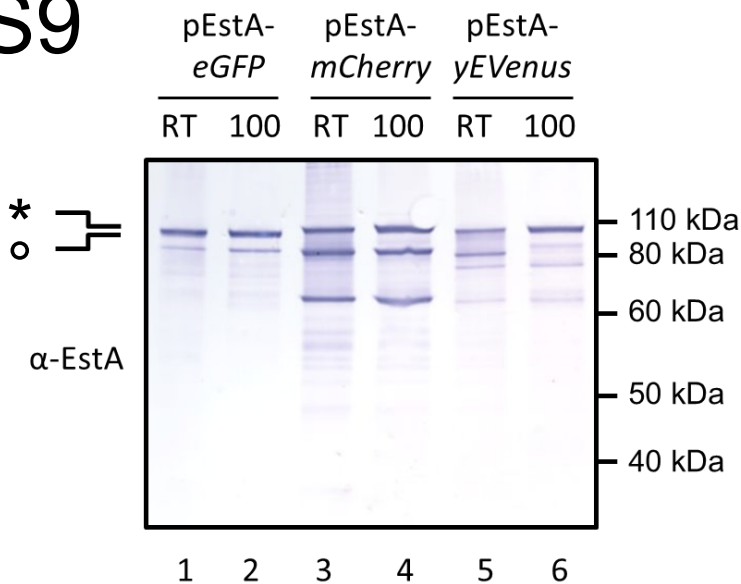

# S10

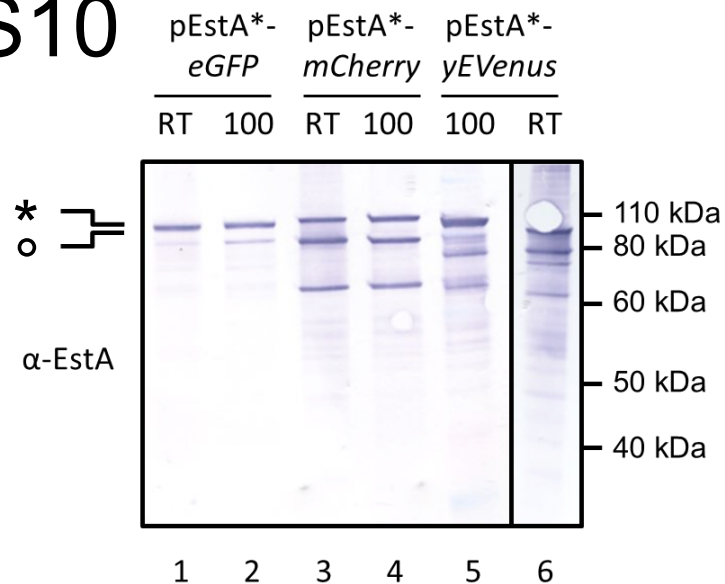

**Figures S8-S10: Heat modifiability analysis of proteins in the membrane fractions of *P. stutzeri* A15 pEstA\*-*aIIA/aIIB/attM/bla/eGFP/mCherry/yEVENUS* and pEstA-*eGFP/mCherry/yEVENUS*.** Fusion proteins in the membrane fractions of induced cells of *P. stutzeri* A15 pEstA\*-*aIIA/aIIB/attM/bla* (S8), pEstA-*eGFP/mCherry/yEVENUS* (S9) and pEstA\*-*eGFP/mCherry/yEVENUS* (S10) were tested for heat modifiability. SDS-PAGE samples were incubated at room temperature (RT) or 100°C and analyzed with Western blot using anti E-tag antibodies ( $\alpha$ -E-tag) or anti-EstA serum ( $\alpha$ -EstA). The band with the higher apparent molecular weight, containing the signal peptide, is indicated with a '\*'. The band with the lower apparent molecular weight, without the signal peptide is indicated with an 'o'. Molecular weight markers are indicated at the side of the panels.
