# Supplementary material for: Probing the applicability of autotransporter based surface display with the EstA autotransporter of Pseudomonas stutzeri A15
Source: PubMed Central journal article supplement (PMC3546941; doi:10.1186/1475-2859-11-158), 2012-12-13
Supplement: 1475-2859-11-158-S7.pdf [file 1475-2859-11-158-S7.pdf]

Table S2: Primers used in this study

| Primer | Sequence (5' - 3')                                                                                                                                            |
|--------|---------------------------------------------------------------------------------------------------------------------------------------------------------------|
| AI2981 | ACTGTCTAGATGGGAAGTCTCGCTGCTG                                                                                                                                  |
| AI2982 | ACTGAAGCTTCTCCCTCTACAGATCCAAGGC                                                                                                                               |
| AI2984 | ACTGTCTAGAGTCGCTACTGCCGATAGC                                                                                                                                  |
| AI3505 | ACTGCCATGGCACAAAGCGCTCTCAAGCCGCTTGC GG CAGCCGTTCTGCTCACCTGCGTGTCCAGC<br>GTCGCTACTGCCGATCGGCCAGCCGGCCATTCCACACAACATACGAGC                                      |
| AI3507 | ACTGTCTAGAGCGCGGCTCCAGCGGGTCCGGGTACGGCACCCGGGGCGCCGGCCTCGGGGGCCGT<br>TCTTCTCGCTTATCCC<br>ACTGGAATTCATAAATGCAAAGCGCTCTCAAGCCGCTTGC GG CAGCCGTTCTGCTCACCTGCGTGT |
| AI4184 | CCAGCGTCGCTACTGCCGATCGGCCAGCCGGCCATTCCACACAACATACGAGC                                                                                                         |
| AI4567 | ACTGGGCCAGCCGGCCTACAGTAAAGAAGCTTTATTTTCGTACCAGC                                                                                                               |
| AI4568 | ACTGGGCCTCGGGGGCCCTATATATTCAGGGAACACTTTACAACCTTTTTCC                                                                                                          |
| AI4569 | GCCTTGGATCTGTAGAGGGAG                                                                                                                                         |
| AI4570 | TTCAGGGGCACAAATGCG                                                                                                                                            |
| AI4571 | CCGTGGCCACCACAGCCCGGCCTGC                                                                                                                                     |
| AI4572 | GCAGGCCGGGCTGTGGTGGCCACGG                                                                                                                                     |
| AI4956 | ACTGGGCCTCGGGGGCCCCCGGTAAAATTCGGGAGCC                                                                                                                         |
| AI4957 | ACTGGGCCAGCCGGCCTTTCAGTCGGGTACGCTG                                                                                                                            |
| AI4958 | ACTGGGCCTCGGGGGCCCTTCATAGAATCCGTCCGTGGATTTG                                                                                                                   |
| AI4959 | ACTGGGCCAGCCGGCCTGGAATAAGCTGTTTCGTTCTCGACC                                                                                                                    |
| AI4985 | ACTGTCTAGAGCGGTTACCAGATCAGC                                                                                                                                   |
| AI4986 | ACTGGTCGACGTCCACTTTCTGG                                                                                                                                       |
| AI5083 | CGCATCGCTCAGCGCTCGCCGAATACGATG                                                                                                                                |
| AI5084 | CATCGTATTCGGCGACCGCTGAGCGATGCG                                                                                                                                |
| AI5085 | CGCTCAGGAAGTTGAACGTCG                                                                                                                                         |
| AI5245 | ACTGGGCCAGCCGGCCTTCTAAAGGTGAAGAATTATTCACTGGTG                                                                                                                 |
| AI5246 | ACTGGGCCTCGGGGGCCCTTTGTACAATTCATCCATACCATGGG                                                                                                                  |
| AI5247 | ACTGGGCCAGCCGGCCTGTGAGCAAGGGCGAGGAG                                                                                                                           |
| AI5248 | ACTGGGCCTCGGGGGCCCTTGTACAGCTCGTCCATGCC                                                                                                                        |
| AI6276 | GCGGCTTGGCCATCGTCACCGGGTTGGTG                                                                                                                                 |
| AI6277 | CACCAACCCGGTGACGATGGCCCAAGCCGC                                                                                                                                |
| AI6278 | GTCGCTCAGGAAGTTGAACG                                                                                                                                          |
| AI6280 | CGCTGGATTTGATTCGGAATTAGC                                                                                                                                      |
| AI7193 | ACTGGGCCAGCCGGCCTATGAGTATTCAACATTTCCGTGTCGC                                                                                                                   |
| AI7194 | ACTGGGCCTCGGGGGCCCAATGCTTAATCAGTGAGGCAC                                                                                                                       |
| AI7328 | GATCCCATGGGATCTGATAAGAATTCGTAAGAGATACCCCGTGCAAAGCGCTCTCAAGCCG                                                                                                 |
| AI7329 | GATCTCTAGAGCGCGGCTCC                                                                                                                                          |
